# Supplementary material
Source: PubMed Central journal article supplement (PMC4187644)
Supplement: EC.00088-14_zek999094349so1.pdf [file EC.00088-14_zek999094349so1.pdf]

Supplement Fig 1

|               |                                                                                                                 |
|---------------|-----------------------------------------------------------------------------------------------------------------|
| Optimized 7   | ATGGAATTT <b>TACAAA</b> ACT <b>TTCTTCTCGCA</b> CTTT <b>ACGAATACG</b> TTT <b>AACTCGGAA</b> TACATC                |
| Original 7    | ATGGAATTTTATAAGAACTTTTTTTTTCACATTTTACAAAACCTTTAATAGTGAATATATT                                                   |
| Optimized 67  | TTTGAC <b>CTGAAAGGTAGCACG</b> AAAATCGAT <b>GACAAC</b> GAAATCGCATCA <b>TTTATCAAATCG</b>                          |
| Original 67   | TTTGACTTAAAGGGTAGTACAAAAATTGATGATAATGAAATTGCGAGTTTTATTAAGTCT                                                    |
| Optimized 127 | <b>AACGATCTGTGCGAAACG</b> CAAGAAAATTGTCGAA <b>CTGTACATCG</b> AAAAGAAA <b>ATTAAC</b>                             |
| Original 127  | AATGATTTGTGTGAAAAATGATAAGAAGATAGTAGAATTATATATTGAGAAGAAAATAAA                                                    |
| Optimized 187 | <b>AAAATCATGCTGATC</b> AAA <b>TAC</b> ATGGAA <b>CGT</b> AAAAACAAA <b>ACCTG</b> TTT <b>CGCGGC</b> AAA <b>ATT</b> |
| Original 187  | AAGATTATGTTAATAAAAATATATGGAAAGAAAAACAAAACATTATTTAGAGGAAAGATA                                                    |
| Optimized 247 | CAT <b>CTGATGCTGGT</b> TTT <b>ATCAGCCCGCTG</b> TGGATT <b>TTC</b> TATATG <b>CTGTACCTGAG</b> CAAA                 |
| Original 247  | CATTTAATGTTAGTATTTATATCACCATTATGGATTTTTTATATGTTATATTTATCAAAA                                                    |
| Optimized 307 | <b>ACCTGACGGCGGTATC</b> TTT <b>ACG</b> TCT <b>ATTGCCGTCCTG</b> TGATTTTCTTT <b>AACTTTTTC</b>                     |
| Original 307  | ACATTAACAGCAAGAATATTTACCTCTATAGCTGTACTATGTATTTCTTTAATTTCTTT                                                     |
| Optimized 367 | GCC <b>TCTTTCCTGCTGC</b> ATA <b>ACTTC</b> GAATGGAAA <b>CCG</b> AAA <b>TTCTTTTCATCATC</b> GAAAAA                 |
| Original 367  | GCCTCCTTTTTACTTCACAATTTTGAATGGAAACCCAAATTTTTTTTTATAATTGAAAA                                                     |
| Optimized 427 | ATGGAT <b>CAC</b> TT <b>CGGCATC</b> TTT <b>CTG</b> ATGATTAGT <b>GGT</b> TCC <b>CTGCTGCCGGTGCAGG</b> CACTG       |
| Original 427  | ATGGATCATTTCCGGAATTTTCTAATGATTAGTGGATCCTTGTTACCAGTTCAAGCTTTA                                                    |
| Optimized 487 | <b>CTGTTCAAC</b> AAA <b>ATCAA</b> CT <b>GCTGTTC</b> TTTATT <b>TCACTGCAATTC</b> TTT <b>GCTATCCTGTTC</b>          |
| Original 487  | TTGTTAATAAAAATTAAGTTATTATTTTTTATTTCTCTTCAGTTTTTTGCAATATTATTT                                                    |
| Optimized 547 | <b>GGCTGCCTGATTG</b> TTTTCTTTAGTTGT <b>TTCAGCTCTGGT</b> AAT <b>CGT</b> TTT <b>ATCCGC</b> TCCATG                 |
| Original 547  | GGATGCCTTATCGTTTTCTTTAGTTGTTTTTCATCGGAAATAGATTTATAAGGTCCATG                                                     |
| Optimized 607 | <b>ATCTTCACC</b> ATT <b>GCGGGCCTGCTGCAC</b> ATT <b>ATC</b> TTTATT <b>CGCGAC</b> TAT <b>GTCTCACTGCTG</b>         |
| Original 607  | ATTTTACTATTGCTGGATTACTACATATTATTTTATTAGAGATTATGTATCATTATTA                                                      |
| Optimized 667 | <b>TACGGCAA</b> GAATTT <b>ATCCTGCTGATTCTGCTGGCGT</b> GCTGATATT <b>ATCGGTGCCGTG</b>                              |
| Original 667  | TATGGAAAGGAATTTATCTTTTAAACTTCTGGGTGTTTTATATATTATAGGAGCAGTT                                                      |
| Optimized 727 | <b>ATCTACTCGGT</b> TAAA <b>AAACCGAAC</b> ATTTTT <b>CCGGGC</b> ATT <b>CTG</b> GAATTT <b>CATGAAGTG</b> TTC        |
| Original 727  | ATATATCTGTGAAAAAGCCAAATATTTTTCCAGGTATTTTGGAAATTCATGAAGTTTTC                                                     |
| Optimized 787 | CATATT <b>TGCTGTCTGGGTCTGCTGTC</b> TGC <b>ACCTTCGTTCTG</b> AATTGT <b>AGCGT</b> GATTAAA                          |
| Original 787  | CATATTTGTTGTCTAGGAAGTGCTGTATGCACATTTGTCCATAAATGTAGTGTATTAAA                                                     |
| Optimized 847 | <b>CGTACC</b>                                                                                                   |
| Original 847  | AGAACA                                                                                                          |

Supplement Fig. 1 Nucleotide sequence of optimized versus native *P. falciparum* hemolysin showing changes in red.

M.tuberculosis..NP\_215601.1  
M.avium..ZP\_05215609.1  
E.histolytica..XP\_654314.2  
E.dispar..XP\_001735342.1  
S.aureus..NP\_372694.1  
S.lugdunensis..ADC86995.1  
S.pneumoniae..ZP\_01825080.1  
S.agalactiae..ZP\_08650398.1  
N.meningitidis..EGC63223.1  
N.gonorrhoeae..ZP\_06153818.1  
E.faecalis..NP\_815393.1  
E.faecium..ZP\_05678486.1  
B.cereus..P54176.1  
B.anthraxis..YP\_028350.1  
V.cholerae..ZP\_01974604.1  
V.vulnificus..AAP50516.2  
V.parahaemolyticus..NP\_799427.1  
Y.pestis..ZP\_06204569.1  
Y.enterocolitica..YP\_001007557.1  
E.coliO104:H4..EGR73138.1  
E.coliO157:H7..EFX34143.1  
S.dysenteriae..EDX36078.1  
E.cloacae..YP\_003614707.1  
S.enterica..EGA37169.1  
B.bovis..XP\_001609898.1  
T.gondii..EEE24257.1  
P.berghei..XP\_678678.1  
P.knowlesi..XP\_002260320.1  
P.vivax..XP\_001615833.1  
P.falciparum..XP\_001348702.2

TTLAYTAATITMFTVSATYH---RVNW-KSATARNWMKRADHSMIFVFIAGSYTPFALL  
STLIYAAATVALFAVSATYH---RVKW-KTEAARTRMKRLDHSMI FVFIAGSYTPFARL  
AILCFCLASFTLYFNSTTYHLLNILLPN--SICLRYFFQRLDHITIYIMISGCYLCFI FT  
AILCFCLASFTLYFNSTTYHLLNILLPN--SICLRYFFQRLDHITIYIMISGCYLCFI FT  
SMSIYVISIFMMFISSTIYH---SMQN--ETPHKYILRIIDHSMIYVAISGTYTPILLT  
SVSIFVISIFLMFISSTIYH---TMKN--NSIHKYVLRIIDHSMIYVAISGTYTPVLLH  
GVSIFVISLFLMFLSSTIYH---SMAY--GSTHKYVLRIIDHSMIYVAIAGSYTPVVL T  
GTSIFVTSLFLMFLSSSIYH---SMTY--NSLQKYVLRMIDHSMIYIAIAGSYTPVAL S  
SVSVYGISLLLLYLSSSLYH---GIAA---GKLK SILKKT DHCMIYVLIAGSYTPFAL V  
SVSVYGISLLLLYLSSSLYH---GIAA---GKLK SILKKT DHCMIYVLIAGSYTPFAL V  
SYAIYGSM LILLFLSSTL FH---SLIF---TRAKKVFQVFDHSSIFLLIAGSYTPFCL I  
SYAIYGSM LILLFLTSTL FH---SLIF---TKAKKVFQVFDHSSIFLLIAGSYTPFCL L  
AFTVYGVSMFLLYLFSTLLH---SIHH---PKVEKLFTILDHSAIYLLIAGTYTPFLL I  
AFTVYGVSMFLLYLFSTLLH---SIHH---PKVEKLFTILDHSAIYLLIAGTYTPFLL I  
SMSIYGGSMIALFLASTLYH---AIPY---QRAKRWLKTFDHC AIYLLIAGSYTPFLL V  
SMAIYGSSIIVLFLASTLYH---AIPH---PKAKRWLKTFDHS AIYLLIAGSYTPFLL V  
SMAIYGSSIIVLFLASTLYH---AIPH---PKAKRWLKTFDHS AIYLLIAGSYTPFLL V  
SYSLYGSSIILLFLASTLYH---AIPH---RRAKLWLQKFDHCAIYILIAGTYTPFLL V  
SYSLYGSSIILLFLASTLYH---AIPH---RKAKLWLQKFDHCAIYILIAGTYTPFLL V  
SYSLYGGS MILLFLASTLYH---AIPH---QRAKMWLKKFDHCAIYLLIAGTYTPFLL V  
SYSLYGGS MILLFLASTLYH---AIPH---QRAKMWLKKFDHCAIYLLIAGTYTPFLL V  
SYSLYGGS MILLFLASTLYH---AIPH---QRAKMWLKKFDHCAIYLLIAGTYTPFLL V  
SYSLYGGS MILLFLASTLYH---AIPH---QRAKIWLKKFDHCAIYLLIAGTYTPFLL V  
SYSLYGGS MILLFLASTLYH---AIPH---QRAKIWLKKFDHCAIYLLIAGTYTPFLL V  
EYIVAFVCCILNFAASATLH---YSRW--NLNSLDLCLKADYAFIFLMIGGSATPATIA  
AAAISCFTFVWNFMASALLH---CFEWTHRPGIYQLLHKLDHAGIFMVISGSTTPIPML  
FTSVALMCIFFNFFASFLH---NFEW--TPKY YFLIEKLDHIGIFLMISGSALPAAAL  
FTSIAALCMFFNFFASFLH---NFEW--KPELYFLIEKIDHIGIFLMISGSCLPVPAL  
FTSIAALCMFFNFFASFLH---NFEW--KPELFFLIEKIDHMGIFLMISGSCLPVPAL  
FTSIAVLCIFFNFFASFLH---NFEW--KPKFFF IIEKMDHFGIFLMISGSLLPVQAL

. \* \* \*: \*:\* \*. \*  
↑ ↑ ↑ ↑  
**D I I G**

Supplement Figure 2 alignment of conserved regions of hemolysin III

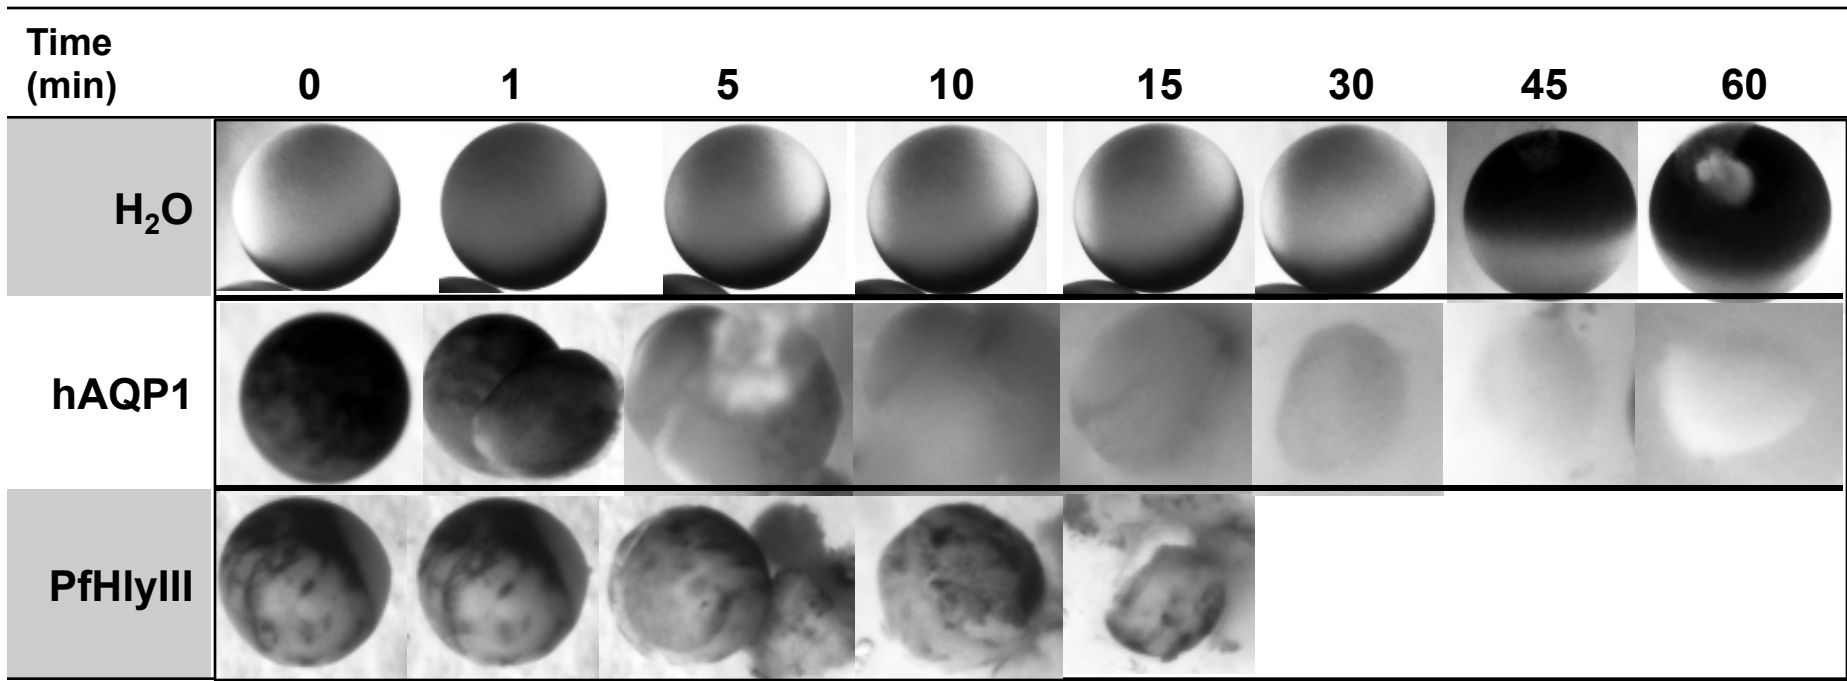

**Supplementary Figure 3.** Time course of hAQP1 and PfHlyIII expressing oocytes rupturing in hypotonic buffer (water) compared to water –injected controls.
